# Supplementary material
Source: PubMed Central journal article supplement (PMC4163643)
Supplement: supp_127.18.3928_JCS143537.pdf [file supp_127.18.3928_JCS143537.pdf]

Figure S1

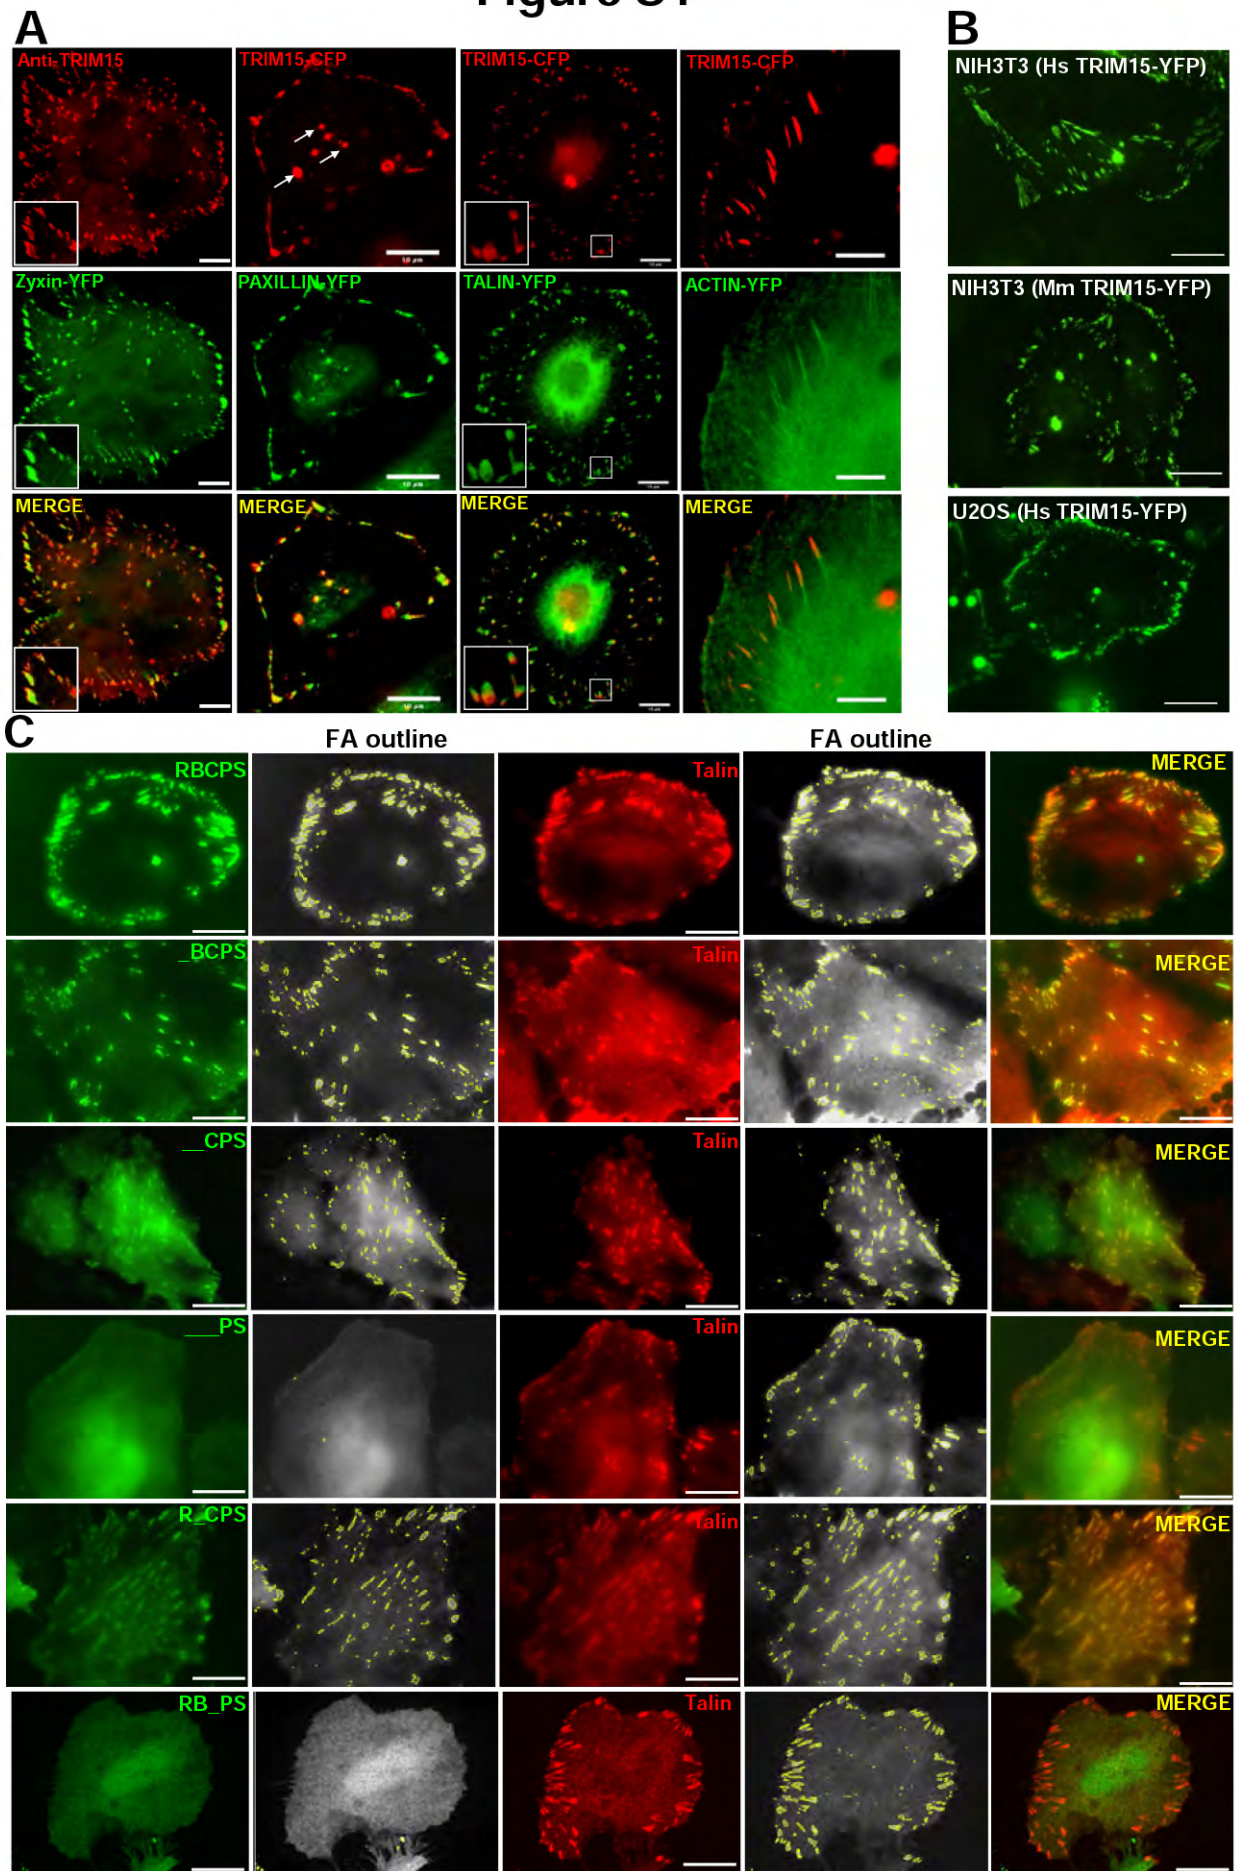





# Figure S3

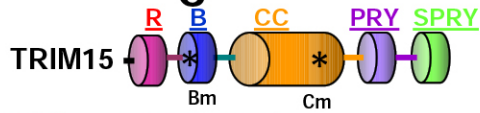

**A**

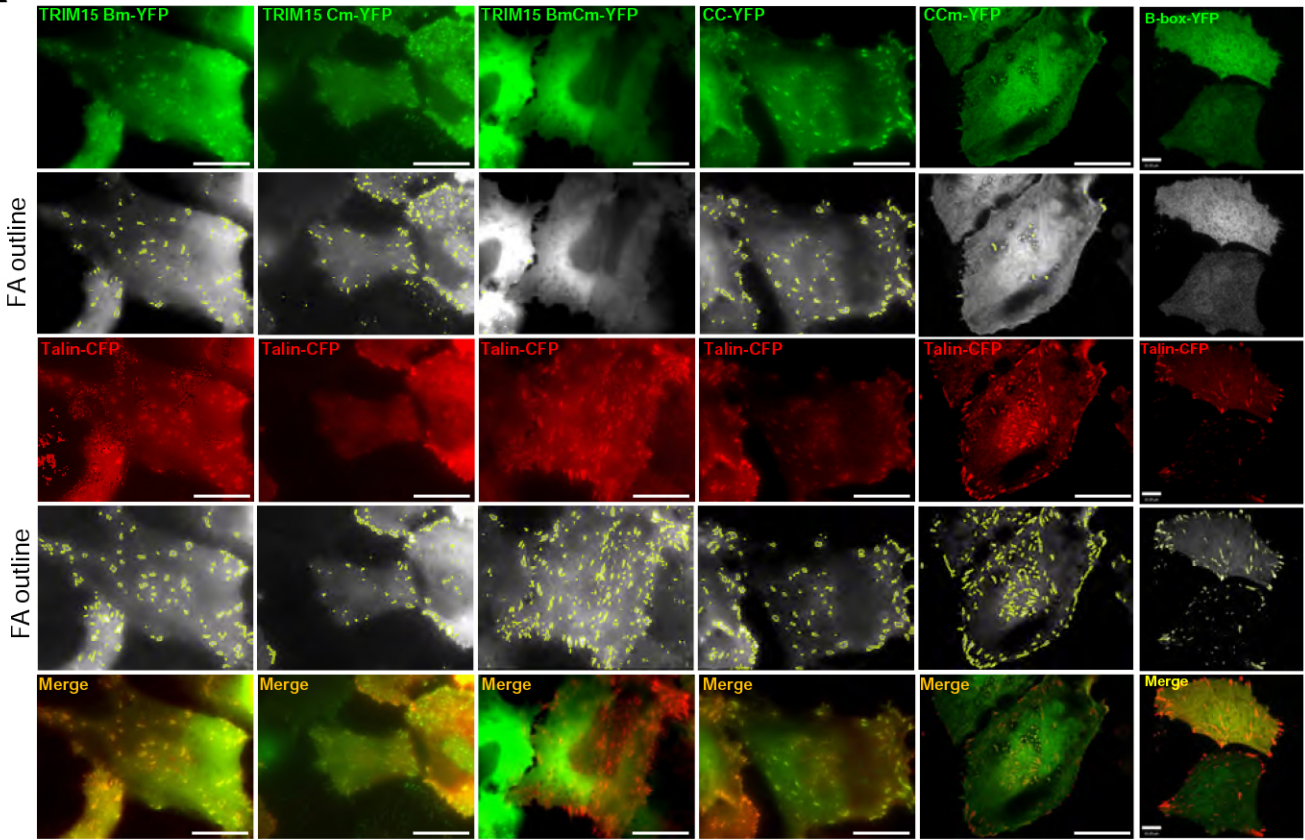

**B**

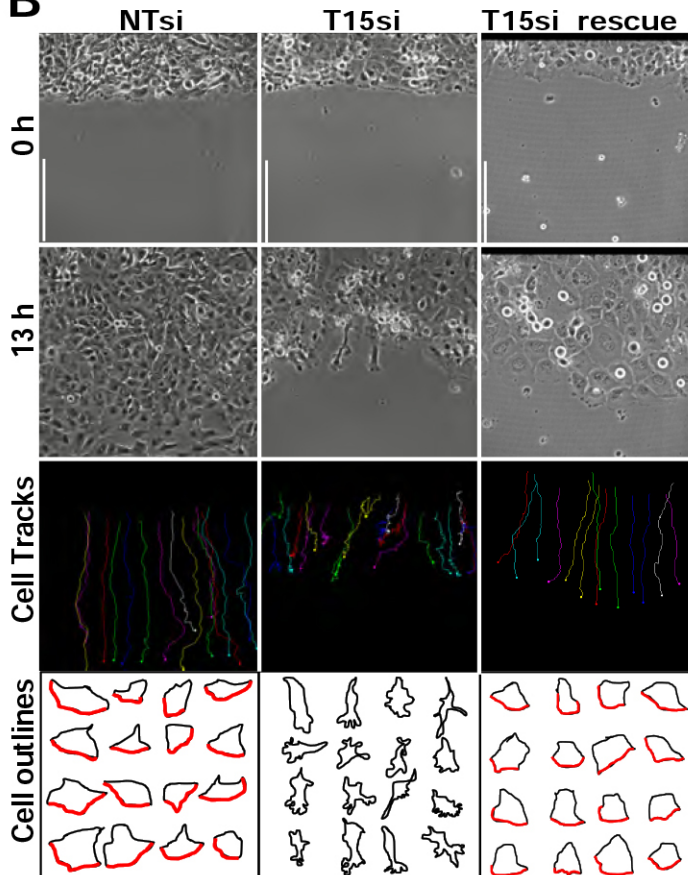

**C**

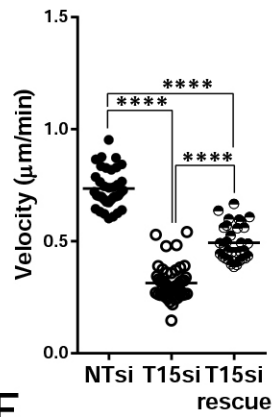

**D**

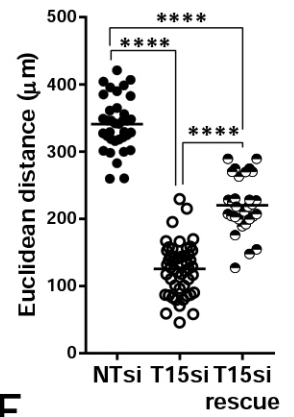

**E**

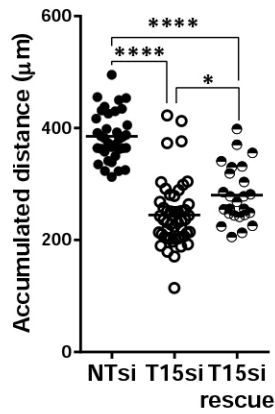

**F**

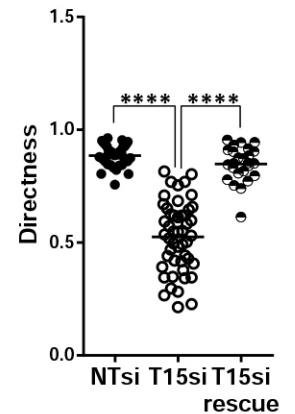

# Figure S4

## A

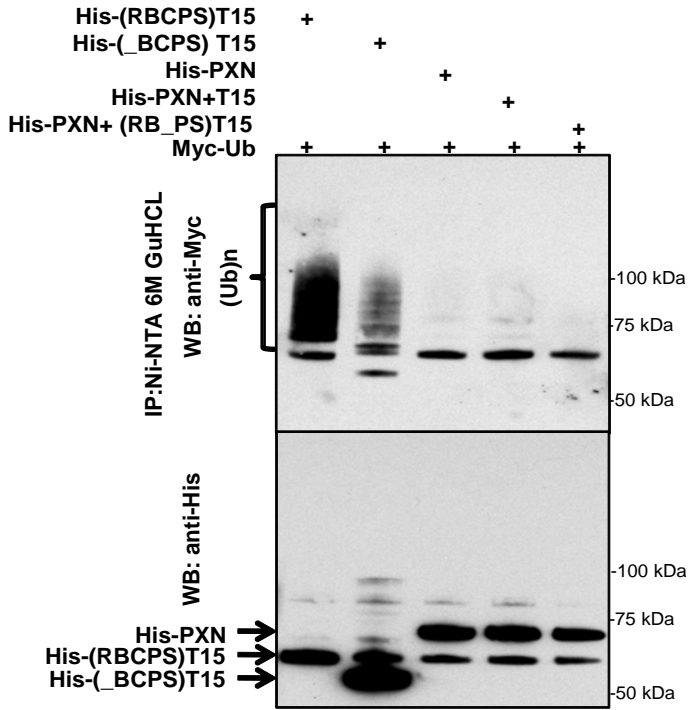

## B

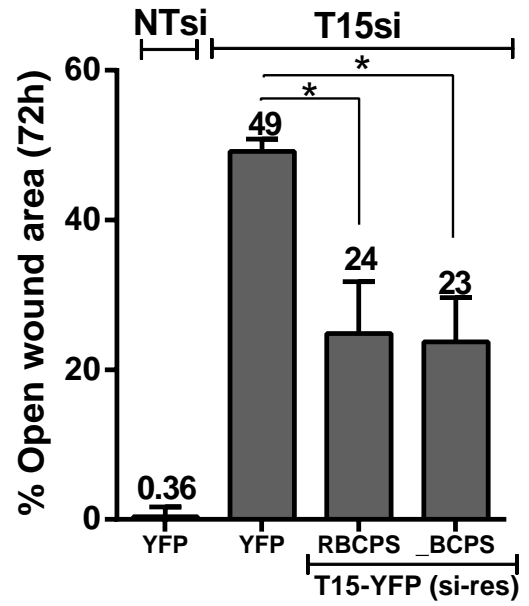

1 **Online supplemental material**

2 **Supplementary figure and Movie legends**

3

4 **Fig. S1. The coiled coil domain of TRIM15 is essential for targeting to focal adhesions.** (A)  
5 Columns 1-4 show split and merged images of HeLa cells expressing YFP-tagged (green) zyxin,  
6 paxillin, talin or actin and CFP-tagged or immunolocalized untagged TRIM15 (anti-TRIM15; red).  
7 The arrows in the third column indicate cytoplasmic bodies. Scale bar: 10  $\mu$ m. (B) Localization of  
8 Human (Hs) or mouse (Mm) YFP-tagged TRIM15 in indicated cell types. Scale bar: 10  $\mu$ m.

9

10 **Fig. S2. The oligomerization activity of B-box contributes to interaction with paxillin in addition**  
11 **to coiled coil domain of TRIM15 that harbors the paxillin binding site.** (A & B) Sequence  
12 alignment of a stretch in TRIM15 coiled coil region (aa 204-221) with the putative paxillin binding  
13 subdomain (PBS) of vinculin, actopaxin and FAK and with TRIM15 protein from hsa (*Homo sapiens*;  
14 human), ptr (*Pan troglodytes*; chimpanzee), mcc (*Macaca mulatta*; rhesus macaques), bta (*Bos taurus*;  
15 cow) and mmu (*Mus musculus*; mice) showing the conserved putative paxillin binding subdomain. (C)  
16 A secondary structure analyses predicted using the PSPIRED v3.3 software (Jones, 1999) for TRIM15  
17 amino acid sequence (120-292) encompassing the coiled coil domain is shown along with confidence  
18 of prediction (blue). The cylindrical regions shown in pink depict the predicted helical regions [H] and  
19 the lines represent the loops [L]. The amino acids corresponding to putative PBS (VTRLG) near the  
20 end of the coiled coil helical region is underlined and asterisks are shown below the mutated amino  
21 acids. (D) The ability of mutant YFP-tagged TRIM15 to dimerize was tested by co-expression with  
22 FLAG-tagged wild-type TRIM15 in HEK293 cells. Cell lysates were immunoprecipitated using  
23 FLAG antibodies followed by western blotting with antibodies to FLAG and GFP. (E) Gel filtration  
24 profile of wild-type and B-box deleted TRIM15 purified from *E. coli*. Fraction eluted at ~8 ml  
25 represents higher-order oligomers while fraction eluted at ~12 ml corresponds to a molecular weight  
26 of ~114 kDa. The *E. coli* purified TRIM15 (RBCPS) and B-box deleted TRIM15 (R\_CPS) are shown  
27 as coomassie stained gel along with molecular weight markers.

28

29 **Fig. S3. (A) Point mutations in coiled coil and B-box domain abolish focal adhesion targeting of**  
30 **TRIM15.** TIRFM images of HeLa cells expressing indicated TRIM15-YFP mutants (green) from Fig.

31 7B and the YFP fusion of the B-box domain of TRIM15 is shown here with talin-CFP as a focal  
32 adhesion reference marker to ensure that samples were imaged at the correct focal plane. This  
33 reference focal plane was critical to ascertain cytoplasmic fluorescence of TRIM15 mutants or  
34 individual domains that fail to localize to FAs. Individual FAs are outlined for clarity. Scale bar: 10  
35  $\mu\text{m}$ . (B) **TRIM15-depletion impairs cell migration and directional persistence in HT1080 cells.**  
36 HT1080 cell monolayers treated with indicated siRNAs with or without ectopic expression of siRNA-  
37 resistant TRIM15 (T15si rescue) for 72 h were wounded and cell motility followed by live cell imaging  
38 for 12-14 h. Selected frames of Movie S1 at 0 and 13 h after wounding are shown. Migration  
39 trajectories of individual cells are shown as dots and lines. The outlines of representative cell  
40 boundaries and direction of migration are shown in the right to emphasize the single leading edge  
41 (shown in red) seen for NTsi- and T15si-treated rescued cells compared to multiple lateral  
42 lamellopodia in T15si-treated cells. (C-F) Plots of mentioned cell migration parameters for three  
43 experiments as in E are shown. The parameters for more than 40-60 individual cells (open and closed  
44 circles) were computed. Statistical significance values \*\*\*\*, \* correspond to  $p < 0.0001$  and  $p < 0.05$ ,  
45 respectively. ns: not significant.

46

47 **Fig. S4. TRIM15 is a self-ubiquitinating E3 ubiquitin ligase but does not ubiquitinate paxillin**  
48 **and E3 activity is not required for its function.** (A) TRIM15 self- and paxillin-ubiquitination were  
49 tested by expressing wild-type and RING-deleted His-tagged TRIM15 or paxillin in the presence of  
50 myc-tagged ubiquitin. His-tagged TRIM15 or paxillin were isolated using Ni-NTA under denaturing  
51 conditions using 6 M Guanidinium HCL and the ubiquitination tested by western blotting with anti-  
52 myc antibodies. (B) Percent open wound area at 72 h determined using images analyzed by Tscratch  
53 software during the course of wound healing assay carried out in HeLa cells treated with either non-  
54 targeting (NT) or TRIM15 (T15) siRNA and transfected with 100 ng of plasmids expressing indicated  
55 siRNA resistant YFP fusions of full length or RING deleted ( $\Delta$ BCPS) TRIM15 or YFP alone. Data  
56 represent the mean  $\pm$  SD of three experiments carried out in triplicates. Statistical significance values  
57 \* corresponds to  $p < 0.05$ .

58

59 **Movie S1. Time-lapse differential interference contrast imaging of wound healing assay.**

60 Confluent monolayer of HT1080 cells were treated with control non-targeting siRNA (NTsi) (top row)

61 or TRIM15 siRNA without or with ectopic expression of siRNA resistant TRIM15 (middle and bottom  
62 rows respectively). The cells were imaged from 0 to 13 h after wounding the monolayer. Tracked  
63 individual cells (colored dots) and their migration trajectories (colored lines) are shown in the right  
64 panels. Note the smooth trajectories for control and TRIM15si rescue panels compared to random  
65 migratory pattern of TRIM15 siRNA treated cells. In addition, TRIM15 siRNA treated cells display  
66 multiple lateral filopodia compared to a dominant leading edge exhibited by control and TRIM15si-  
67 treated rescued cells. See also Fig. S3 B-F. Scale bar: 100  $\mu$ m.

68

69 **Movie S2. TRIM15-depletion impairs two dimensional migration in HeLa cells.** HeLa cells were  
70 treated for 48 h with control NT siRNA (NTsi; top panel) or TRIM15 siRNA (T15si) panel) without  
71 or with ectopic expression of siRNA resistant TRIM15-YFP for rescue (middle and bottom panels  
72 respectively). The cells were replated on fibronectin-coated coverslips and rested for 12-13 h before  
73 time-lapse differential interference contrast imaging with a 10 X objective lens. The first frame in the  
74 rescue panel shows an image acquired in the YFP channel (red) to identify the cell expressing siRNA  
75 resistant TRIM15-YFP. At this magnification, FAs cannot be seen and TRIM15-YFP expressing cells  
76 are identified by the presence of fluorescent cytoplasmic bodies. Tracked individual cells (colored  
77 dots) and their migration trajectories (colored lines) are shown as overlays. Note the restricted  
78 migration trajectories of TRIM15-depleted cells compared to long tracks displayed by control and the  
79 rescued cell. The longer migration trajectories seen, if any, in TRIM-depleted cells is a consequence  
80 of cell rounding, detachment and reattachment due to cell division. Scale bar: 10  $\mu$ m.

81

82 **Movie S3. A comparison of FA dynamics in control and TRIM15-depleted cells under steady-**  
83 **state conditions.** HeLa cells stably expressing zyxin-YFP and treated for 48-72 h with control NT  
84 (NTsi; left panel) or TRIM15 (T15si; right panel) siRNA were subjected to time-lapse microscopy for  
85 2-3 h to monitor FA dynamics. Examples of FA assembly and disassembly events are highlighted  
86 using green and red boxes respectively. FA assembly and disassembly rates were calculated from 6-8  
87 time lapse movies encompassing >200 FAs using Focal Adhesion Analysis Server. See also Fig. 6 C,  
88 D. Scale bar: 10  $\mu$ m.

89



90 **Movie S4. A comparison of microtubule-induced FA disassembly in control and TRIM15-**  
91 **depleted cells.** HeLa cells stably expressing zyxin-YFP and treated with control NT (NTsi; left panel)  
92 or TRIM15 (T15si; right panel) siRNA were treated with 10  $\mu$ M nocodazole for 2-4 h to inhibit  
93 microtubule polymerization and prevent FA disassembly. The cells were then imaged for 2 h  
94 immediately after nocodazole was washed out to monitor FA disassembly. Note the rapid disassembly  
95 of FAs in control cells compared to that seen for TRIM15 siRNA treated cells. An example of FA  
96 disassembly event is shown in the boxed region. FA disassembly rates were calculated from at least 6  
97 movies for each condition encompassing  $\sim$ 175 FAs. See also Fig. 6L. Scale bar: 10  $\mu$ m.

98

99 **Movie S5. Disassembly modes of TRIM15 and Zyxin at focal adhesions.** HeLa cells stably  
100 expressing TRIM15-YFP (left panel) or Zyxin-YFP (right panel) were subjected to time-lapse  
101 microscopy for 90 min at steady-state to monitor the way they disassemble from FAs. The red arrow  
102 heads point to disassembling FAs. Note that TRIM15 disassembles from FAs by collapsing into an  
103 oligomeric structure, to some extent instantaneously whereas zyxin dissipates slowly into the actin  
104 network and cytoplasm during disassembly. Scale bar: 10  $\mu$ m

105

106 **Supplementary References:**

107

108 **Jones, D. T.** (1999). Protein secondary structure prediction based on position-specific  
109 scoring matrices. *Journal of molecular biology* **292**, 195-202.

110



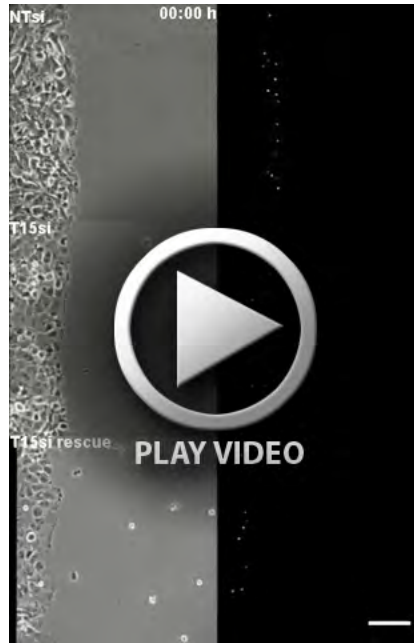

Movie 1.

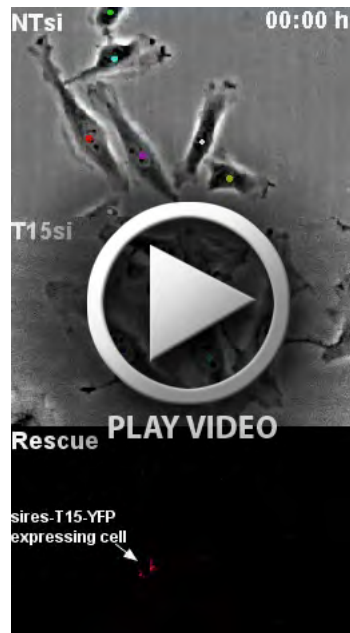

Movie 2.

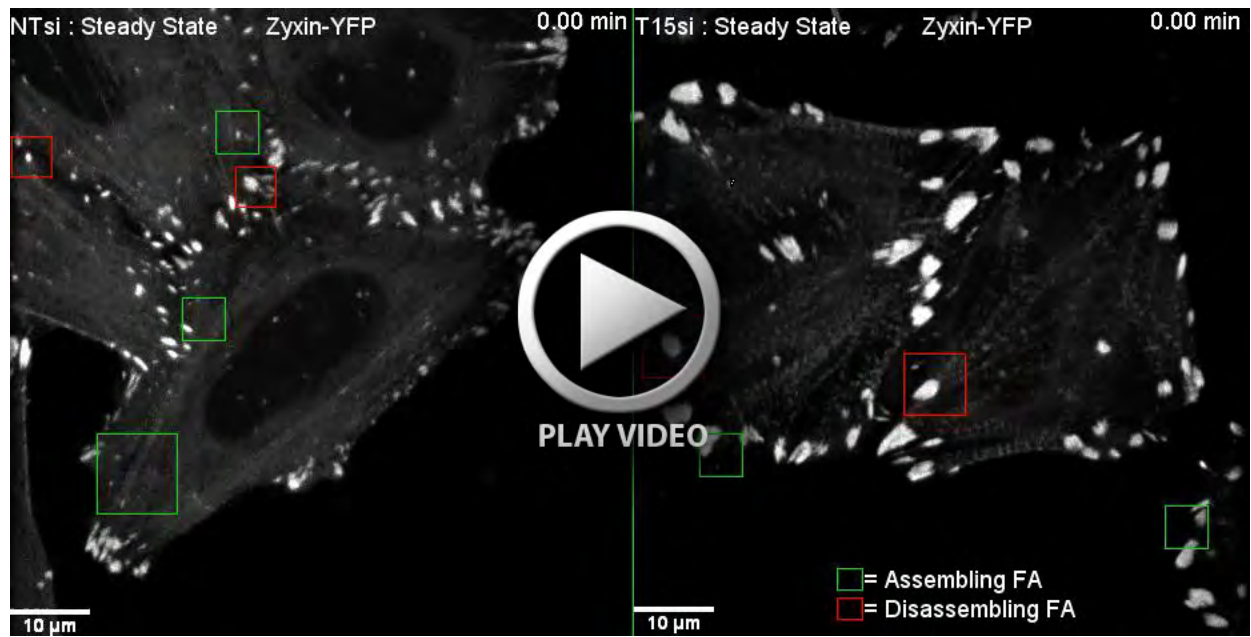

Movie 3.

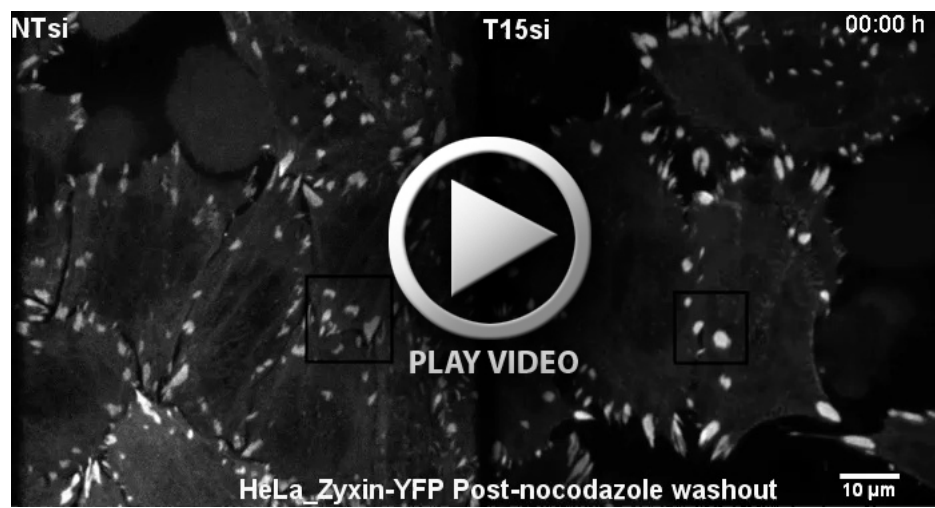

Movie 4.

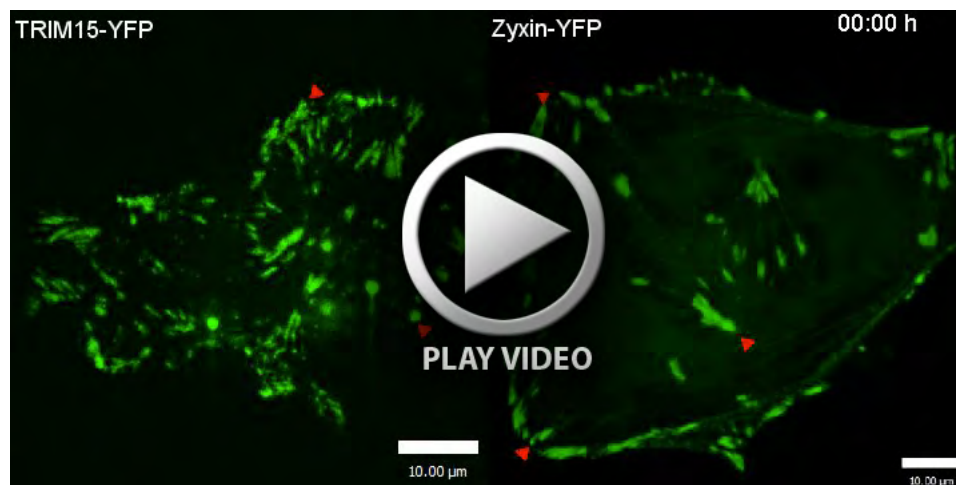

Movie 5.

| Paxillin amino acid co-ordinates | Peptide Sequence   |
|----------------------------------|--------------------|
| 76-93                            | FIHQQPQSSSPVYGSSAK |
| 111-123                          | VGEEEHVYSFPNK      |
| 265-277                          | ELDELMASLSDFK      |
| 363-375                          | KPIAGQVVTAMGK      |

**Table S1. Details of peptides derived from paxillin that were identified by mass spectrometric analyses of TRIM15 immunoprecipitates.**

| Constructs                                           | Source                                              | Reference                          |
|------------------------------------------------------|-----------------------------------------------------|------------------------------------|
| CFP fusions of human zyxin and paxillin              | Pekka Lappalainen (University of Helsinki, Finland) | (Hotulainen and Lappalainen, 2006) |
| CFP fusion of Human Talin1                           | Pietro De Camilli (Yale University, New Haven, CT)  | (Lee et al., 2005).                |
| Lentivirus expression construct for mTagRFPT-tubulin | Brett Lindenbach (Yale University, New Haven, CT)   | (Counihan et al., 2011)            |

**Table S2. Details of constructs used in the study.**

| siRNA/shRNA                                 | Sequence                | Source                                  |
|---------------------------------------------|-------------------------|-----------------------------------------|
| TRIM15 siRNA #1                             | CCCUGAAGGUGGUCCAUGAUU   | Dharmacon Inc.                          |
| TRIM15 siRNA #2                             | GCGAGAACGAUGCCGAGUUUU   | Dharmacon Inc.                          |
| Paxillin siRNA                              | CCCUGACGAAAGAGAAGCCUAUU | Dharmacon Inc                           |
| control non-targeting (NT) luciferase siRNA | CUUACGCUGAGUACUUCGAAATT | Samchully Pharm CO., LTD (Seoul, Korea) |
| TRIM15 shRNA#1                              | CAGCGGTTGTTTTACTTT      | OpenBiosystems Inc                      |
| TRIM15 shRNA#2                              | AGCGGTTGTTTTACTTTA      | OpenBiosystems Inc                      |
| control non-targeting (NT) luciferase shRNA | TACAAACGCTCTCATCGACAAG  | OpenBiosystems Inc.                     |

**Table S3. List of siRNA/shRNA used in the study and their sources**
